# Supplementary material for: Effects of Acyclovir and IVIG on Behavioral Outcomes after HSV1 CNS Infection
Source: Hindawi journal article supplement (doi:10.1155/2017/5238402), 2017-01-01
Supplement: f1 [file 5238402.f1.pdf]

Supplementary Figure 1.

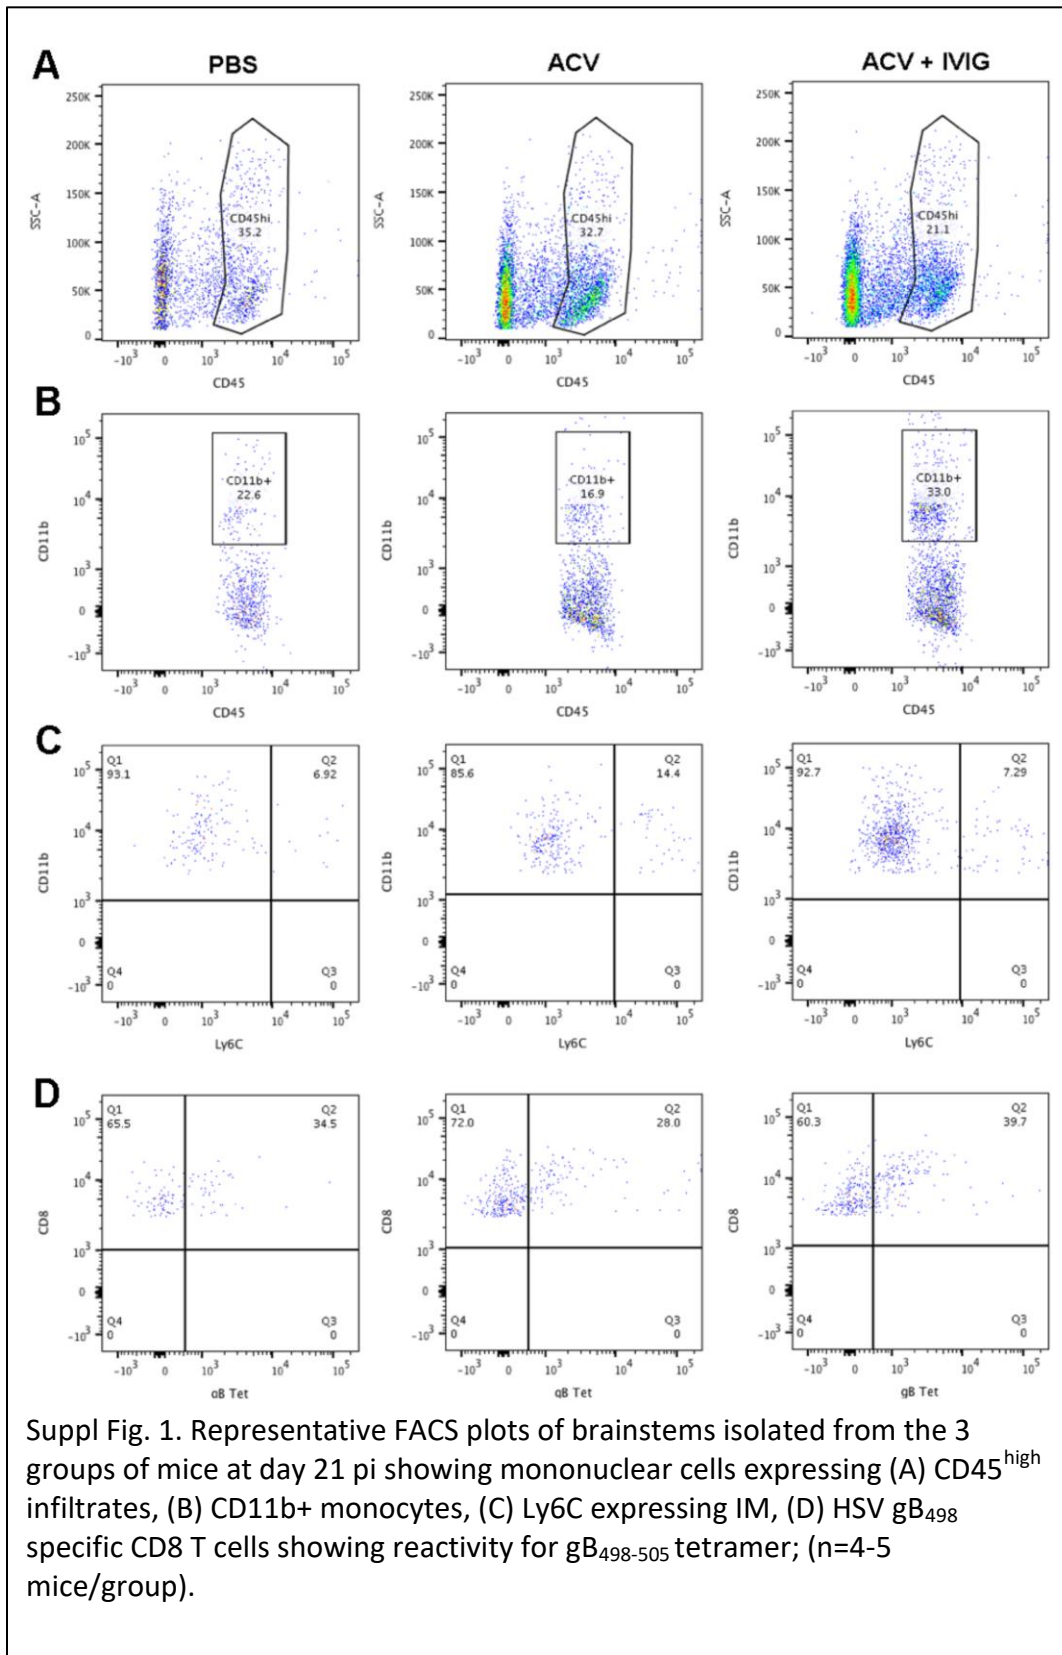

Supplementary Figure 2.

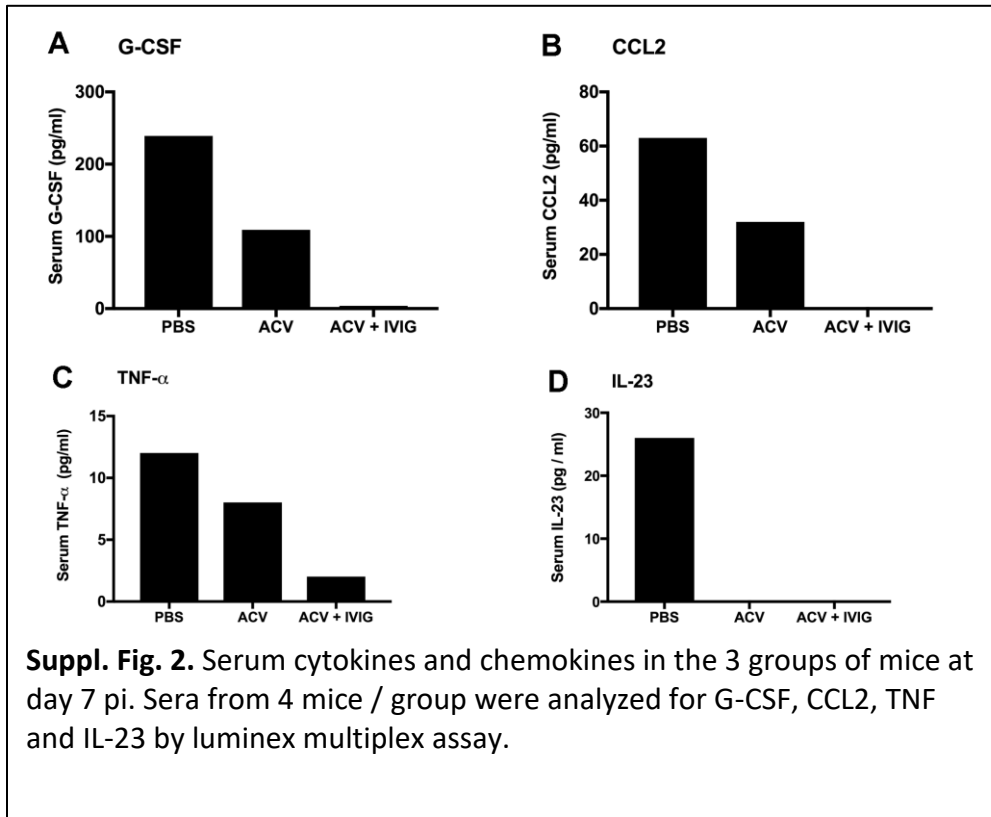

| <b>GO: Biological Process</b>                    |              |          |                |                  |                       |
|--------------------------------------------------|--------------|----------|----------------|------------------|-----------------------|
| <b>Term</b>                                      | <b>Count</b> | <b>%</b> | <b>P-Value</b> | <b>Benjamini</b> | <b>-log(p-value*)</b> |
| <b>Male: Day 2 PI</b>                            |              |          |                |                  |                       |
| very-low-density lipoprotein particle remodeling | 3            | 10.7     | 3.00E-05       | 9.00E-03         | 2.05                  |
| reverse cholesterol transport                    | 3            | 10.7     | 1.10E-04       | 1.70E-02         | 1.77                  |
| <b>Male: Day 7 ACV</b>                           |              |          |                |                  |                       |
| blood coagulation                                | 6            | 11.1     | 2.50E-06       | 6.10E-04         | 3.21                  |
| acute-phase response                             | 5            | 9.3      | 2.00E-06       | 9.50E-04         | 3.02                  |
| hemostasis                                       | 5            | 9.3      | 6.00E-06       | 9.70E-04         | 3.01                  |
| complement activation, classical pathway         | 5            | 9.3      | 1.20E-05       | 1.50E-03         | 2.82                  |
| lipoprotein metabolic process                    | 4            | 7.4      | 7.70E-05       | 7.40E-03         | 2.13                  |
| lipoprotein biosynthetic process                 | 3            | 5.6      | 9.90E-05       | 7.90E-03         | 2.10                  |
| very-low-density lipoprotein particle remodeling | 3            | 5.6      | 1.40E-04       | 9.40E-03         | 2.03                  |
| negative regulation of peptidase activity        | 5            | 9.3      | 2.40E-04       | 1.40E-02         | 1.85                  |
| complement activation, alternative pathway       | 3            | 5.6      | 2.90E-04       | 1.60E-02         | 1.80                  |
| immune system process                            | 7            | 13       | 4.50E-04       | 2.10E-02         | 1.68                  |
| reverse cholesterol transport                    | 3            | 5.6      | 5.10E-04       | 2.20E-02         | 1.66                  |
| phosphatidylcholine metabolic process            | 3            | 5.6      | 5.10E-04       | 2.20E-02         | 1.66                  |
| cholesterol homeostasis                          | 4            | 7.4      | 5.90E-04       | 2.30E-02         | 1.64                  |
| actin filament capping                           | 3            | 5.6      | 9.90E-04       | 3.60E-02         | 1.44                  |
| response to copper ion                           | 3            | 5.6      | 9.90E-04       | 3.60E-02         | 1.44                  |
| cholesterol transport                            | 3            | 5.6      | 1.20E-03       | 4.10E-02         | 1.39                  |
| triglyceride catabolic process                   | 3            | 5.6      | 1.20E-03       | 4.10E-02         | 1.39                  |
| cholesterol metabolic process                    | 4            | 7.4      | 1.60E-03       | 5.00E-02         | 1.30                  |
| <b>Male: Day 7 ACV+HVIG</b>                      |              |          |                |                  |                       |
| negative regulation of peptidase activity        | 5            | 15.2     | 2.20E-05       | 4.80E-03         | 2.32                  |
| <b>Male: Day 7 PBS</b>                           |              |          |                |                  |                       |
| blood coagulation                                | 8            | 13.8     | 4.10E-09       | 2.00E-06         | 5.70                  |
| acute-phase response                             | 6            | 10.3     | 4.90E-08       | 8.00E-06         | 5.10                  |
| negative regulation of peptidase activity        | 8            | 13.8     | 4.20E-08       | 1.00E-05         | 5.00                  |
| hemostasis                                       | 6            | 10.3     | 2.00E-07       | 2.50E-05         | 4.60                  |
| response to cytokine                             | 6            | 10.3     | 3.50E-06       | 3.40E-04         | 3.47                  |
| cholesterol metabolic process                    | 5            | 8.6      | 1.20E-04       | 7.50E-03         | 2.12                  |
| lipoprotein biosynthetic process                 | 3            | 5.2      | 1.20E-04       | 8.40E-03         | 2.08                  |
| lipoprotein metabolic process                    | 4            | 6.9      | 1.00E-04       | 8.50E-03         | 2.07                  |
| very-low-density lipoprotein particle remodeling | 3            | 5.2      | 1.70E-04       | 9.10E-03         | 2.04                  |
| complement activation, alternative pathway       | 3            | 5.2      | 3.60E-04       | 1.70E-02         | 1.77                  |
| complement activation, classical pathway         | 4            | 6.9      | 5.30E-04       | 2.30E-02         | 1.64                  |
| reverse cholesterol transport                    | 3            | 5.2      | 6.20E-04       | 2.50E-02         | 1.60                  |
| cholesterol homeostasis                          | 4            | 6.9      | 7.90E-04       | 2.70E-02         | 1.57                  |
| fibrinolysis                                     | 3            | 5.2      | 8.30E-04       | 2.70E-02         | 1.57                  |
| immune system process                            | 7            | 12.1     | 7.80E-04       | 2.90E-02         | 1.54                  |
| response to peptide hormone                      | 4            | 6.9      | 1.20E-03       | 3.40E-02         | 1.47                  |
| actin filament capping                           | 3            | 5.2      | 1.20E-03       | 3.60E-02         | 1.44                  |
| response to copper ion                           | 3            | 5.2      | 1.20E-03       | 3.60E-02         | 1.44                  |
| triglyceride catabolic process                   | 3            | 5.2      | 1.50E-03       | 4.00E-02         | 1.40                  |
| <b>Female: Day 2 PI</b>                          |              |          |                |                  |                       |
| acute-phase response                             | 4            | 33.3     | 5.50E-07       | 3.30E-05         | 4.48                  |
| <b>Female: Day 7 ACV</b>                         |              |          |                |                  |                       |
| acute-phase response                             | 5            | 27.8     | 1.20E-08       | 1.80E-06         | 5.74                  |
| <b>Female: Day 7 ACV+HVIG</b>                    |              |          |                |                  |                       |
| acute-phase response                             | 5            | 35.7     | 5.80E-09       | 6.30E-07         | 6.20                  |
| <b>Female: Day 7 PBS</b>                         |              |          |                |                  |                       |
| acute-phase response                             | 6            | 37.5     | 2.60E-11       | 2.70E-09         | 8.57                  |

**Supplementary Table 1:** GO biological process categories enriched in serum proteins of HSV infected male and female mice.
